# Supplementary material
Source: PubMed Central journal article supplement (PMC3719525)
Supplement: AEM.00926-13_zam999104557so1.pdf [file AEM.00926-13_zam999104557so1.pdf]

**Table S1. List of primers used in the study**

| <b>Primer name</b> | <b>Sequence (5' – 3')</b>               | <b>Restriction site</b> | <b>Purpose</b>                                                                                                                    |
|--------------------|-----------------------------------------|-------------------------|-----------------------------------------------------------------------------------------------------------------------------------|
| PRO 6722           | AT <u>AGATCT</u> CAAGGCCGATGGTGCGGTCG   | <i>Bgl</i> III          | To amplify the 5' HR1 of <i>srtA</i> gene                                                                                         |
| PRO 6723           | ATGAGCTCCTGGCCCTCAGACGGGCATC            | <i>Ecl</i> II3611       | To amplify the 3' HR1 of <i>srtA</i> gene                                                                                         |
| PRO 6724           | AT <u>ATTTAAAT</u> CGCAGGAAGCGTGGAGCCAA | <i>Swa</i> I            | To amplify the 5' HR2 of <i>srtA</i> gene                                                                                         |
| PRO 6725           | AT <u>CTCGAGC</u> GCCCAACAAAAGGCGTTC    | <i>Xho</i> I            | To amplify the 3' HR2 of <i>srtA</i> gene                                                                                         |
| PRO 7080           | GATGCCCGTCTGAGGGCCAG                    |                         | 5' flanking region of <i>srtA</i> gene to check gene replacement                                                                  |
| PRO 7081           | TTGGCTCCACGCTTCCTGCG                    |                         | 3' flanking region of <i>srtA</i> gene to check gene replacement<br>3' <i>lab129_01548</i> to check <i>srtA</i> gene organization |
| cat96F             | TCAAATACAGCTTTTAGAACTGG                 |                         | 5' cat cassette pNZ5319 (36)                                                                                                      |
| cat96R             | ACCATCAAAAATTGTATAAAGTGGC               |                         | 3' cat cassette pNZ5319 (36)                                                                                                      |
| EryintF            | CGATACCGTTTACGAAATTGG                   |                         | 5' ery cassette pNZ5319 (36)                                                                                                      |
| EryintR            | CTTGCTCATAAGTAACGGTAC                   |                         | 3' ery cassette pNZ5319 (36)                                                                                                      |
| PRO 7838           | GGAAGGCACGTTAGGAATCATTACC               |                         | 5' pNZ5319 to check gene replacement                                                                                              |
| PRO 7839           | GAGATCTTCTTCACGTTACTAAAGGG              |                         | 3' pNZ5319 to check gene replacement                                                                                              |
| PRO 8177           | ATGAGCTCGTTGCATTAGTTGATTGAGATCG         | <i>Sac</i> I            | To amplify the 5' of <i>srtA</i> gene for complementation                                                                         |
| PRO 8150           | ATGAGCTCGAAGATATCGATACCCCTAGAATGTAATAAT | <i>Sac</i> I            | To amplify the 3' of <i>srtA</i> gene for complementation                                                                         |
| pseu 383           | CCCCTGACGAGCATCACAA                     |                         | 3' pLAB1301 to check insertion in the MCS                                                                                         |
| pseu 384           | GCGTCAGACCCCGTAGAAAA                    |                         | 5' pLAB1301 to check insertion in the MCS                                                                                         |
| S&P-00012          | AGGCCGAAGAACGCGATA                      |                         | To amplify the 5' of <i>lab129_01546</i> for qRT-PCR                                                                              |
| S&P-00013          | ACGTACTGCGCCACTTGTTG                    |                         | To amplify the 3' of <i>lab129_01546</i> for qRT-PCR                                                                              |
| S&P-00014          | GCGCTGCCAGCTATAACATG                    |                         | To amplify the 5' of <i>lab129_01548</i> for qRT-PCR                                                                              |
| S&P-00015          | TGATGAATGCCAGCAATAATATTTG               |                         | To amplify the 3' of <i>lab129_01548</i> for qRT-PCR                                                                              |
| S&P-00016          | CCGATGCCACGTGCTTTATT                    |                         | To amplify the 5' of <i>lab129_01549</i> for qRT-PCR                                                                              |

|           |                               |  |                                                                                          |
|-----------|-------------------------------|--|------------------------------------------------------------------------------------------|
| S&P-00017 | TTCCTGTCGCAAACGCATT           |  | To amplify the 3' of <i>lab129_01549</i> for qRT-PCR                                     |
| S&P-00026 | CTGGTGCTGCTAAGGCTCTTG         |  | To amplify the 5' of housekeeping gene for qRT-PCR                                       |
| S&P-00027 | GTTGTGCATGGCCTTGTAATTTAC      |  | To amplify the 3' of housekeeping gene for qRT-PCR                                       |
| S&P-00028 | TTGGTCTCGTTAGTCGGTGTTG        |  | To amplify the 5' of <i>lab129_01550</i> for qRT-PCR                                     |
| S&P-00029 | G TTCAGACCCGTGTGAGCATT        |  | To amplify the 3' of <i>lab129_01550</i> for qRT-PCR                                     |
| S&P-00030 | GCCGTTCAAGCGGTCAAT            |  | To amplify the 5' of <i>lab129_01551</i> for qRT-PCR                                     |
| S&P-00031 | GCCACACCCGTTACATTAACATC       |  | To amplify the 3' of <i>lab129_01551</i> for qRT-PCR                                     |
| S&P-00038 | ACGTGATTGGCTCGATTGC           |  | To amplify the 5' of <i>lab129_01547 (srtA)</i> for qRT-PCR                              |
| S&P-00039 | GCTGACACCATTACCGATTGG         |  | To amplify the 3' of <i>lab129_01547 (srtA)</i> for qRT-PCR                              |
| PRO 7809  | ATGAGCTCGGCTAAGACGGTTAAGCAG   |  | 5' <i>lab129_01547</i> to check <i>srtA</i> gene organization by PCR on cDNA of CMPG5300 |
| PRO 8917  | ATCTCGAGCGCATTGGGGCTCTCATCATC |  | 3' <i>lab129_01549</i> to check <i>srtA</i> gene organization by PCR on cDNA of CMPG5300 |
| S&P-00042 | GCGCTTGATACCATGCACAAAGTC      |  | 3' <i>lab129_01550</i> to check <i>srtA</i> gene organization by PCR on cDNA of CMPG5300 |
| S&P-00043 | GGCATTGACCGCTTGAACGGCCTTAGC   |  | 3' <i>lab129_01551</i> to check <i>srtA</i> gene organization by PCR on cDNA of CMPG5300 |

**Table S2. Protocols used for optimization of electroporation.**

| S. No | Buffer set used for washing | Culture conditions   | Voltage | Electroporation efficiency (number of transformants/ $\mu$ g DNA) |
|-------|-----------------------------|----------------------|---------|-------------------------------------------------------------------|
| 1     | Set I                       | Anaerobic            | 200 V   | 3                                                                 |
| 2     |                             | Anaerobic            | 400 V   | 0                                                                 |
| 3     |                             | Aerobic w/o shaking  | 200 V   | 1                                                                 |
| 4     |                             | Aerobic w/o shaking  | 400 V   | 0                                                                 |
| 5     |                             | Aerobic with shaking | 200 V   | 4                                                                 |
| 6     |                             | Aerobic with shaking | 400 V   | 0                                                                 |
| 7     | Set II                      | Anaerobic            | 200 V   | 4                                                                 |
| 8     |                             | Anaerobic            | 400 V   | 16                                                                |
| 9     |                             | Aerobic w/o shaking  | 200 V   | 24                                                                |
| 10    |                             | Aerobic w/o shaking  | 400 V   | 48                                                                |
| 11    |                             | Aerobic with shaking | 200 V   | 21                                                                |
| 12    |                             | Aerobic with shaking | 400 V   | 13                                                                |

**Table S3. Putative sortase-dependent proteins (SDPs) of *L. plantarum* CMPG5300**

| Protein ID   | product                                                   | AA   | LPXTG motif | signal peptide <sup>#</sup>                                   |
|--------------|-----------------------------------------------------------|------|-------------|---------------------------------------------------------------|
| lab129_00260 | cell surface protein                                      | 2489 | LPQTGE      | MNRFITSKQHYKMYKKGRFWVFAGITVATFTLNPLISRA <sup>#</sup>          |
| lab129_00360 | cell surface protein                                      | 834  | LPQTDE      | MNKLLYTSITTAALFVGTQLGVNNAQA                                   |
| lab129_00362 | cell surface protein, SEC10/PgrA surface exclusion domain | 903  | LPQTNE      | MKKSRIALMSTALVAAGATAIGTATTAQA                                 |
| lab129_00533 | cell surface protein, alpha/beta hydrolase family         | 901  | LPQTDE      | MKRNSQQSTTVVDHYKMFKDGKHWVYAGITIAGLGLSTLMLTTNALA <sup>#</sup>  |
| lab129_00830 | mucus-binding protein, LPXTG-motif cell wall anchor       | 845  | LPQTDE      | MSKDNQKMTGDSVYRVKMYKDGKRWVYAGATTLALAAGLVFANVNASA <sup>#</sup> |
| lab129_00902 | cell surface adherence protein, collagen-binding domain   | 727  | LPQTSE      | MRRKLVGYMLSMMLTVILALFMLGSTAHA                                 |
| lab129_00908 | cell surface adherence protein, collagen-binding domain   | 506  | LPQTNE      | MRKKWRWLLALTGIFFLMFGPPLVSQA                                   |
| lab129_01009 | cell surface protein precursor, CscD family <sup>s</sup>  | 123  | LPQTNE      | MAKFRRLVLLSLSLGLALAGGCRSPDALA                                 |
| lab129_01040 | cell surface adherence protein, collagen-binding domain   | 990  | LPQTSE      | MRLIDFKTWIMGTAAMLTLIVTNQTVSA                                  |
| lab129_01118 | adherence-associated mucus-binding protein                | 1345 | LPQTDE      | MRYTRGKWRVTNPKVWLFSSVLILGWRIVPTVAQA                           |
| lab129_01174 | cell surface protein precursor                            | 463  | LPQTGE      | no (pseudogene)                                               |
| lab129_01196 | cell surface protein precursor, CscD family <sup>s</sup>  | 125  | LPQTGV      | MMRWLLIRGLLGLLIGLPSIGGAAQTVGTSSTQIQFYTSRSA                    |
| lab129_01448 | cell surface protein precursor                            | 1231 | LPKTNS      | MYTENTGKHHRNLPLVWLLPLLVVISFWGVSQNIMVVDA                       |
| lab129_01662 | cell surface protein precursor                            | 834  | LPQTDE      | MMERKRTNFKMYKIGRRWAFACAVILTMGTTTLVARA <sup>#</sup>            |
| lab129_01674 | cell surface protein precursor                            | 419  | LPQTGE      | MSKALKIVMGITMLTGGIMAQKMTVHA                                   |
| lab129_01688 | cell surface protein precursor                            | 617  | LPQTNE      | MKLSKRGLFWLLGLVSFTILLFFNQLPGAQA                               |
| lab129_01986 | cell surface protein precursor, CscD family <sup>s</sup>  | 113  | LPQTDE      | MVQRFSVCVATILISLIMLTITGVA                                     |
| lab129_02128 | mucus-binding protein                                     | 1192 | LPQTDE      | MKPNNVNNQNKRHQSRWVITSATAMILTTLIASQAAAA                        |

|              |                                                          |      |        |                                                                        |
|--------------|----------------------------------------------------------|------|--------|------------------------------------------------------------------------|
| lab129_02262 | cell surface protein precursor, CscD family <sup>§</sup> | 123  | LPQTSE | MKRLGFTIAISTLLCWGWSAPIIGVA                                             |
| lab129_02270 | cell surface protein precursor, CscD family <sup>§</sup> | 141  | LPQTSE | MPNKWWRLILGVMLVLSWAIPVRA                                               |
| lab129_02388 | cell surface protein precursor, CscD family <sup>§</sup> | 92   | LPQMNG | no                                                                     |
| lab129_02464 | mucus-binding protein precursor                          | 2219 | LPQTND | MRNRLNRLGLESKSHYKLYKSGRRWVAASITVFSVGIGLTFSQV <sup>#</sup>              |
| lab129_02519 | cell surface protein precursor                           | 1005 | LPQTSE | MRLIVRSVRLFLKKWGITINYRESEVKCYKMYKSGKMWLFASASLLLLNTQLLTAHA <sup>#</sup> |
| lab129_02520 | cell surface protein precursor                           | 1039 | LPQTGE | MEQVKKRYKMYKSGKVWLFAGITLVTLNMNVVTGRA <sup>#</sup>                      |
| lab129_02713 | mucus-binding protein                                    | 1179 | LPQTSE | MNKRKIITNPPKWHLITGIAATILAGILTNQDAFA                                    |
| lab129_02725 | mucus-binding protein                                    | 2026 | LPQTGE | MQRRRLQRAQLTEKRTYKMYKKGRLWLIAGLSTFTLGASLLPMTGRA <sup>#</sup>           |
| lab129_02822 | mannose-specific adhesin                                 | 1204 | LPQTDE | MLRNNYFGETKTHYKLYKCGKNWAVMGISLFSGLGMLVTSRPSVA <sup>#</sup>             |
| lab129_03163 | cell-wall proteinase, peptidase S8 family                | 1482 | LPATGD | MRRNSMTEMKRHYKLYKSGSKWKAIAITVSAGAIVLSGNVTQSVAA <sup>#</sup>            |
| lab129_03234 | collagen-binding protein, C-terminus                     | 230  | LPQTGD | no                                                                     |
| lab129_03333 | mucus-binding protein, C-terminus                        | 301  | LPQTDE | no                                                                     |

<sup>#</sup> Some SDPs have a special predicted KxYKxGKxW signal peptide (TIGR03715). This model describes a novel form of signal peptide that occurs as an N-terminal domain with a recognizable motif, reminiscent of the YSIRK and PEP-CTERM forms of signal peptide. This domain tends to occur on long, low-complexity (usually Serine-rich and heavily glycosylated) proteins of the *Firmicutes*. As with YSIRK, the majority of these proteins have the LPxTG cell wall-anchoring motif at the C-terminus (Bensing *et al.*, 2007).

<sup>§</sup>CscD are often encoded by gene clusters involved in the biosynthesis of putative cell-surface protein complexes for carbohydrate utilization, which are conserved in specific Gram-positive bacteria. CscD proteins form a very unusual group among the LPxTG-proteins, since they are extremely short (90–140 residues) and have only 40–60 residues between the signal peptide (which is removed by signal peptidase I) and the LPxTG-anchoring motif (which is cleaved by sortase) (Siezen *et al.*, 2006).

## References

**Bensing BA, Siboo IR, Sullam PM.** 2007. Glycine residues in the hydrophobic core of the GspB signal sequence route export toward the accessory Sec pathway. *J. Bacteriol.* **189**:3846-3854

**Siezen RJ, Boekhorst J, Muscariello L, Molenaar D, Renckens B, Kleerebezem M.** 2006. *Lactobacillus plantarum* gene clusters encoding putative cell-surface protein complexes for carbohydrate utilization are conserved in specific gram-positive bacteria. *BMC Genomics.* **7**:126.
